# Supplementary material
Source: PubMed Central journal article supplement (PMC10345997)
Supplement: kxac006_supplementary_data.pdf [file kxac006_supplementary_data.pdf]

## Supplementary material to *Distributed Cox Proportional Hazards Regression Using Summary-level Information*

DONGDONG LI<sup>1,\*</sup>, WENBIN LU<sup>2</sup>, DI SHU<sup>3,4,5</sup>, SENGWEE TOH<sup>1</sup>, RUI WANG<sup>1,6</sup>

<sup>1</sup> *Department of Population Medicine, Harvard Medical School and Harvard Pilgrim Health Care Institute, Boston, MA USA*

<sup>2</sup> *Department of Statistics, North Carolina State University, Raleigh, NC, USA*

<sup>3</sup> *Department of Biostatistics, Epidemiology and Informatics, University of Pennsylvania Perelman School of Medicine, Philadelphia, PA, USA*

<sup>4</sup> *Department of Pediatrics, Children's Hospital of Philadelphia, Philadelphia, PA, USA*

<sup>5</sup> *Center for Pediatric Clinical Effectiveness, Children's Hospital of Philadelphia, Philadelphia, PA, USA*

<sup>6</sup> *Department of Biostatistics, Harvard T. H. Chan School of Public Health, Boston, MA, USA*

### S1. ADDITIONAL DETAILS FOR SECTION 2 OF THE PAPER

#### S1.1 *Proof*

*Proof of Theorem 2.1.* Denote the true parameter value as  $\boldsymbol{\theta}_0 \triangleq (\boldsymbol{\beta}'_{10}, \dots, \boldsymbol{\beta}'_{K0}, \boldsymbol{\beta}'_0)'$ , where  $\boldsymbol{\beta}_{k0}$ ,  $k = 1, \dots, K$  is the true parameter value within each site. It is assumed that  $\boldsymbol{\beta}_{10} = \dots = \boldsymbol{\beta}_{K0} = \boldsymbol{\beta}_0$ . For ease of derivation we will keep the notation of  $\boldsymbol{\beta}_{k0}$  for now,  $k = 1, \dots, K$ . The set of parameters  $\boldsymbol{\theta} \triangleq (\boldsymbol{\beta}'_1, \dots, \boldsymbol{\beta}'_K, \boldsymbol{\beta}')'$  is estimated by  $\hat{\boldsymbol{\theta}}^{(1)} \triangleq (\hat{\boldsymbol{\beta}}'_1, \dots, \hat{\boldsymbol{\beta}}'_K, \hat{\boldsymbol{\beta}}^{(1)'})'$ , the solution to the  $K + 1$  estimating equations  $\mathbf{U}_{\boldsymbol{\beta}_k}^* = \mathbf{0}$  for  $k = 1, \dots, K$  and  $\mathbf{U}_{\boldsymbol{\theta}} = \mathbf{0}$ . Under regularity conditions (Cox and Hinkley, 1974, p.281),  $\sqrt{n}(\hat{\boldsymbol{\beta}}'_1 - \boldsymbol{\beta}'_{10}, \dots, \hat{\boldsymbol{\beta}}'_K - \boldsymbol{\beta}'_{K0}) \xrightarrow{\mathcal{D}} N(\mathbf{0}, \mathbf{I}^{*-1})$  and  $\mathbf{I}^*$  is partitioned

\*To whom correspondence should be addressed. E-mail: dongdong\_li@hphci.harvard.edu

into

$$\mathbf{I}^* = \begin{bmatrix} \mathbf{I}_{11}^* & \cdots & \mathbf{I}_{1K}^* \\ \vdots & \ddots & \vdots \\ \mathbf{I}_{K1}^* & \cdots & \mathbf{I}_{KK}^* \end{bmatrix}$$

where  $n\mathbf{I}_{ij}^*$  is the variance-covariance matrix between  $\mathbf{U}_{\beta_i}^*$  and  $\mathbf{U}_{\beta_j}^*$  for  $i, j = 1, \dots, K$ , since the  $K$  sites are independent,  $\mathbf{I}_{ij}^* = \mathbf{0}$  for  $i \neq j$ .

The information matrix, denoted by  $\mathbf{I}$ , for the  $K + 1$  score functions ( $\mathbf{U}_{\beta_k}^*$  for  $k = 1, \dots, K$ , and  $\mathbf{U}_\theta$ ) can be partitioned into  $(K + 1) \times (K + 1)$  blocks

$$\mathbf{I} = \begin{bmatrix} \mathbf{I}_{11} & \cdots & \mathbf{I}_{1K} & \mathbf{I}_{1(K+1)} \\ \vdots & \ddots & \vdots & \vdots \\ \mathbf{I}_{K1} & \cdots & \mathbf{I}_{KK} & \mathbf{I}_{K(K+1)} \\ \mathbf{I}_{(K+1)1} & \cdots & \mathbf{I}_{(K+1)K} & \mathbf{I}_{(K+1)(K+1)} \end{bmatrix}$$

Taylor expanding the score function  $\mathbf{U}_{\beta_k}^*$  around  $\beta_{k0}$  and evaluating it at  $\hat{\beta}_k$ :

$$\mathbf{U}_{\beta_k}^*(\hat{\beta}_k) = \mathbf{0} = \mathbf{U}_{\beta_k}^*(\beta_{k0}) - \mathbf{A}_{\beta_k}^*(\beta_{k0})(\hat{\beta}_k - \beta_{k0}) + \mathfrak{o}(\sqrt{n_k})$$

where

$$\mathbf{A}_{\beta_k}^*(\beta_{k0}) = - \left. \frac{\partial \mathbf{U}_{\beta_k}^*}{\partial \beta_k} \right|_{\beta_k = \beta_{k0}}.$$

Similarly,

$$\begin{aligned} \mathbf{U}_\beta(\hat{\beta}_1, \dots, \hat{\beta}_K, \hat{\beta}^{(1)}) = \mathbf{0} &= \mathbf{U}_\theta(\beta_{10}, \dots, \beta_{K0}, \beta_0) - \\ &\mathbf{B}_1(\beta_{10}, \dots, \beta_{K0}, \beta_0)(\hat{\beta}_1 - \beta_{10}) - \\ &\dots - \\ &\mathbf{B}_K(\beta_{10}, \dots, \beta_{K0}, \beta_0)(\hat{\beta}_K - \beta_{K0}) - \\ &\mathbf{B}(\beta_{10}, \dots, \beta_{K0}, \beta_0)(\hat{\beta}^{(1)} - \beta_0) + \\ &\mathfrak{o}(\sqrt{n}) \end{aligned}$$

where

$$\mathbf{B}_k(\beta_{10}, \dots, \beta_{K0}, \beta_0) = - \left. \frac{\partial \mathbf{U}_\theta(\beta_1, \dots, \beta_K, \beta)}{\partial \beta_k} \right|_{\theta = \theta_0}$$

for  $k = 1, \dots, K$ , and

$$\mathbf{B}(\beta_{10}, \dots, \beta_{K0}, \beta_0) = - \left. \frac{\partial \mathbf{U}_\theta(\beta_1, \dots, \beta_K, \beta)}{\partial \beta} \right|_{\theta = \theta_0}.$$

By the law of large numbers, as  $n_k \rightarrow \infty$ ,  $\mathbf{A}_{\beta_k}^*/n_k$ ,  $\mathbf{B}_k/n_k$ , and  $\mathbf{B}/n$  converge to  $\mathbf{I}_{kk}^*$ ,  $\mathbf{I}_{(K+1)k}$ , and  $\mathbf{I}_{(K+1)(K+1)}$ , respectively, for  $k = 1, \dots, K$ . Therefore

$$n^{-\frac{1}{2}} \begin{bmatrix} \mathbf{U}_{\beta_1}^*(\beta_{10}) \\ \vdots \\ \mathbf{U}_{\beta_K}^*(\beta_{K0}) \\ \mathbf{U}_\theta(\theta_0) \end{bmatrix} \approx \sqrt{n} \mathbf{P} \begin{bmatrix} \hat{\beta}_1 - \beta_{10} \\ \vdots \\ \hat{\beta}_K - \beta_{K0} \\ \hat{\beta}^{(1)} - \beta_0 \end{bmatrix}$$

where

$$\mathbf{P} = \begin{bmatrix} \mathbf{I}_{11}^* & \mathbf{0} & \dots & \mathbf{0} & \mathbf{0} \\ \vdots & & & \mathbf{0} & \mathbf{0} \\ \mathbf{0} & \dots & \mathbf{I}_{KK}^* & \mathbf{0} & \mathbf{0} \\ \mathbf{I}_{(K+1)1} & \dots & \mathbf{I}_{(K+1)K} & \mathbf{I}_{(K+1)(K+1)} & \mathbf{0} \end{bmatrix}$$

Next we show that  $\text{cov}(\mathbf{U}_{\beta_k}^*, \mathbf{U}_\theta) \approx \mathbf{0}$ . It suffices to show the case of  $K = 2$ . Let  $\text{Data}_k$  to denote data from the  $k$ -th site. The covariance

$$\begin{aligned} \text{cov}(\mathbf{U}_{\beta_1}^*, \mathbf{U}_\theta) &= \mathbb{E}[\mathbf{U}_{\beta_1}^*(\beta_1) \mathbf{U}_\theta(\theta)] = \mathbb{E}[\mathbb{E}(\mathbf{U}_{\beta_1}^*(\beta_1) \mathbf{U}_\theta(\theta) | \text{Data}_2)] \\ &= \mathbb{E}[\mathbb{E} \mathbf{U}_{\beta_1}^*(\beta_1) \mathbb{E} \mathbf{U}_\theta(\theta) | \text{Data}_2)] = \mathbf{0} \end{aligned}$$

since  $\mathbb{E} \mathbf{U}_{\beta_1}^*(\beta_1) = \mathbf{0}$ . Similarly the covariance between  $\mathbf{U}_{\beta_2}^*$  and  $\mathbf{U}_\theta$  is  $\mathbf{0}$ .

By the Central Limit Theorem,  $n^{-1/2}(\mathbf{U}_{\beta_1}^*(\beta_{10}), \dots, \mathbf{U}_{\beta_K}^*(\beta_{K0}), \mathbf{U}_\theta(\theta_0)) \xrightarrow{\mathcal{D}} N(\mathbf{0}, \mathbf{H})$  where

$$\mathbf{H} = \begin{bmatrix} \mathbf{I}_{11}^* & \dots & \mathbf{I}_{1K}^* & \mathbf{0} \\ \vdots & & \vdots & \vdots \\ \mathbf{I}_{K1}^* & \dots & \mathbf{I}_{KK}^* & \mathbf{0} \\ \mathbf{0} & \dots & \mathbf{0} & \mathbf{I}_{(K+1)(K+1)} \end{bmatrix}$$

Therefore  $\sqrt{n}(\hat{\theta} - \theta_0) \xrightarrow{\mathcal{D}} N(\mathbf{0}, \mathbf{P}^{-1} \mathbf{H} \mathbf{P}'^{-1})$ , and the variance-covariance matrix of  $\hat{\beta}^{(1)}$  is the bottom right corner block, which is

$$\Sigma^{(1)} = \mathbf{I}_{(K+1)(K+1)}^{-1} + \mathbf{I}_{(K+1)(K+1)}^{-1} \left[ \sum_{k=1}^K \mathbf{I}_{(K+1)k} \mathbf{I}_{kk}^{*-1} \mathbf{I}'_{(K+1)k} \right] \mathbf{I}_{(K+1)(K+1)}^{-1}$$

One can use the observed information to estimate  $\mathbf{I}_{(K+1)(K+1)}$ ,  $\mathbf{I}_{(K+1)k}$  and  $\mathbf{I}_{kk}^*$ . The corresponding observed information are  $\mathbf{I}(\hat{\theta}^{(1)}) \triangleq -\partial \mathbf{U}_\theta(\hat{\theta}^{(1)})/\partial \theta$ ,  $\mathbf{I}_k(\hat{\theta}^{(1)}) \triangleq -\partial \mathbf{U}_\theta(\hat{\theta}^{(1)})/\partial \beta_k$ , and

$\mathbf{I}_{kk}^*(\hat{\beta}_k) \triangleq -\partial \mathbf{U}_{\beta_k}^*(\hat{\beta}_k)/\partial \beta_k$ , respectively. Note that the  $\mathbf{I}$  may not be a symmetric matrix, and one may use the negation of approximated Hessian matrix  $-\mathbf{H}^*(\hat{\theta}^{(1)})$  as the estimator for  $\mathbf{I}_{(K+1)(K+1)}$ . Thus the variance estimator in (2.6) follows. Note that with the assumption  $\beta_{10} = \dots = \beta_{K0} = \beta_0$ ,  $\mathbf{I}_{(K+1)(K+1)} = -\mathbb{E}_{\beta_0} \partial \mathbf{U}_{\theta}(\beta_0)/\partial \beta$  is identical to  $\mathbf{I}^* = -\mathbb{E}_{\beta_0} \partial \mathbf{U}_{\beta}^*(\beta_0)/\partial \beta$ , and that  $\mathbf{I}_{(K+1)k} = -\mathbb{E}_{\theta_0} \partial \mathbf{U}_{\theta}(\beta_0)/\partial \beta_k = \mathbf{0}$ , since

$$\begin{aligned}
& -\partial \mathbf{U}_{\theta}(\beta_0)/\partial \beta' \\
&= \sum_{j=1}^d \left\{ \frac{\sum_{k=1}^K \sum_{l \in R_j(k)} \mathbf{X}_l \mathbf{X}_l' e^{\beta_k' \mathbf{X}_l}}{\sum_{k=1}^K \left[ \sum_{l \in R_j(k)} e^{\beta_k' \mathbf{X}_l} + \sum_{l \in R_j(k)} \mathbf{X}_l' e^{\beta_k' \mathbf{X}_l} (\beta - \beta_k) \right]} - \frac{\sum_{k=1}^K \left[ \sum_{l \in R_j(k)} \mathbf{X}_l e^{\beta_k' \mathbf{X}_l} + \sum_{l \in R_j(k)} \mathbf{X}_l \mathbf{X}_l' e^{\beta_k' \mathbf{X}_l} (\beta - \beta_k) \right] \left[ \sum_{k=1}^K \sum_{l \in R_j(k)} \mathbf{X}_l' e^{\beta_k' \mathbf{X}_l} \right]}{\left( \sum_{k=1}^K \left[ \sum_{l \in R_j(k)} e^{\beta_k' \mathbf{X}_l} + \sum_{l \in R_j(k)} \mathbf{X}_l' e^{\beta_k' \mathbf{X}_l} (\beta - \beta_k) \right] \right)^2} \right\} \Big|_{\beta_1 = \dots = \beta_K = \beta = \beta_0} \\
&= \sum_{j=1}^d \left[ \frac{\sum_{k=1}^K \sum_{l \in R_j(k)} \mathbf{X}_l \mathbf{X}_l' e^{\beta_k' \mathbf{X}_l}}{\sum_{k=1}^K \sum_{l \in R_j(k)} e^{\beta_k' \mathbf{X}_l}} - \frac{\left[ \sum_{k=1}^K \sum_{l \in R_j(k)} \mathbf{X}_l e^{\beta_k' \mathbf{X}_l} \right] \left[ \sum_{k=1}^K \sum_{l \in R_j(k)} \mathbf{X}_l' e^{\beta_k' \mathbf{X}_l} \right]'}{\left( \sum_{k=1}^K \sum_{l \in R_j(k)} e^{\beta_k' \mathbf{X}_l} \right)^2} \right] \\
&= -\partial \mathbf{U}_{\beta}^*(\beta_0)/\partial \beta',
\end{aligned}$$

and

$$\begin{aligned}
& -\partial \mathbf{U}_{\theta}(\beta_0)/\partial \beta_k' \\
&= \sum_{j=1}^d \left\{ \frac{\sum_{l \in R_j(k)} \left[ \mathbf{X}_l \mathbf{X}_l' e^{\beta_k' \mathbf{X}_l} + (\mathbf{X}_l \mathbf{X}_l' \mathbf{X}_l e^{\beta_k' \mathbf{X}_l}) (\beta - \beta_k)' - \mathbf{X}_l \mathbf{X}_l' e^{\beta_k' \mathbf{X}_l} \right]}{\sum_{k=1}^K \left[ \sum_{l \in R_j(k)} e^{\beta_k' \mathbf{X}_l} + (\sum_{l \in R_j(k)} \mathbf{X}_l' e^{\beta_k' \mathbf{X}_l}) (\beta - \beta_k) \right]} - \frac{\left( \sum_{k=1}^K \sum_{l \in R_j(k)} \left[ \mathbf{X}_l e^{\beta_k' \mathbf{X}_l} + \mathbf{X}_l \mathbf{X}_l' e^{\beta_k' \mathbf{X}_l} (\beta - \beta_k) \right] \right) \left( \sum_{k=1}^K \sum_{l \in R_j(k)} \left[ \mathbf{X}_l \mathbf{X}_l' e^{\beta_k' \mathbf{X}_l} (\beta - \beta_k) \right] \right)}{\left( \sum_{k=1}^K \sum_{l \in R_j(k)} e^{\beta_k' \mathbf{X}_l} + (\sum_{l \in R_j(k)} \mathbf{X}_l' e^{\beta_k' \mathbf{X}_l}) (\beta - \beta_k) \right)^2} \right\} \Big|_{\beta_1 = \dots = \beta_K = \beta = \beta_0} \\
&= \mathbf{0}
\end{aligned}$$

Therefore, with  $\beta_{10} = \dots = \beta_{K0} = \beta$ ,  $\Sigma^{(1)} = \mathbf{I}^{*-1}(\beta_0)$  as given in (2.5). This completes the proof.  $\square$

*Proof of Theorem 2.2.* The proof for Theorem 2.2 follows similar argument by replacing the score functions  $\mathbf{U}_{\theta}$  to  $\mathbf{S}_{\theta}$ ,  $\mathbf{U}_{\beta_k}^*$  to  $\mathbf{S}_{\beta_k}^*$  and  $\mathbf{U}_{\beta}^*$  to  $\mathbf{S}_{\beta}^*$ .  $\square$

## S1.2 Robust Sandwich Variance

We derive robust variance estimator for  $\hat{\theta}^{(1)}$  for the unstratified model. The estimating equations are equation (2.3) and the estimating equations (2.4) for the  $K$  sites. The formula of the proposed robust sandwich variance estimator is  $\hat{\Sigma}_{rob}^{(1)} = \mathbf{S}^{(1)'} \mathbf{B}^{(1)} \mathbf{S}^{(1)}$ , where

$$\mathbf{S}^{(1)} = \begin{bmatrix} -\hat{\mathbf{I}}^{-1}(\hat{\theta}^{(1)}) \mathbf{I}_1^{-1}(\hat{\theta}^{(1)}) \hat{\mathbf{I}}_{11}^{*-1}(\hat{\beta}_1) \\ \vdots \\ -\hat{\mathbf{I}}^{-1}(\hat{\theta}^{(1)}) \mathbf{I}_K^{-1}(\hat{\theta}^{(1)}) \hat{\mathbf{I}}_{KK}^{*-1}(\hat{\beta}_K) \\ \hat{\mathbf{I}}^{-1}(\hat{\theta}^{(1)}) \end{bmatrix}$$

and

$$\mathbf{B}^{(1)} = \begin{bmatrix} \sum_{i \in \Omega_1} \omega_i(\hat{\beta}_1)^{\otimes 2} & \dots & \mathbf{0} & \sum_{i \in \Omega_1} \omega_i(\hat{\beta}_1) \nu_i(\hat{\beta}^{(1)})' \\ \vdots & & \vdots & \vdots \\ \mathbf{0} & \dots & \sum_{i \in \Omega_K} \omega_i(\hat{\beta}_K)^{\otimes 2} & \sum_{i \in \Omega_K} \omega_i(\hat{\beta}_K) \nu_i(\hat{\beta}^{(1)})' \\ \sum_{i \in \Omega_1} \nu_i(\hat{\beta}^{(1)}) \omega_i(\hat{\beta}_1)' & \dots & \sum_{i \in \Omega_K} \nu_i(\hat{\beta}^{(1)}) \omega_i(\hat{\beta}_K)' & \sum_{i \in \Omega} \nu_i(\hat{\beta}^{(1)})^{\otimes 2} \end{bmatrix}$$

where  $\Omega_k$  is the index set for site  $K$ , and  $\omega_i(\hat{\beta}_k) = \delta_i \left[ \mathbf{X}_i - \frac{\sum_{l \in R_i} \mathbf{X}_l e^{\hat{\beta}'_k \mathbf{X}_l}}{\sum_{l \in R_i} e^{\hat{\beta}'_k \mathbf{X}_l}} \right] - \sum_{j \in D_k} \left[ \frac{I(i \in R_j) e^{\hat{\beta}'_k \mathbf{X}_i}}{\sum_{l \in R_j} e^{\hat{\beta}'_k \mathbf{X}_l}} \left( \mathbf{X}_i - \frac{\sum_{l \in R_j} \mathbf{X}_l e^{\hat{\beta}'_k \mathbf{X}_l}}{\sum_{l \in R_j} e^{\hat{\beta}'_k \mathbf{X}_l}} \right) \right]$ , which is the estimates of the independent and identically distributed (iid) term derived as in Lin and Wei (1989), and for  $i \in \Omega_k$ ,

$$\begin{aligned} \nu_i(\hat{\beta}^{(1)}) = & \delta_i \left[ \mathbf{X}_i - \frac{\sum_{k=1}^K \sum_{l \in R_i(k)} \mathbf{X}_l e^{\hat{\beta}'_k \mathbf{X}_l} + \sum_{k=1}^K \sum_{l \in R_i(k)} \mathbf{X}_l \mathbf{X}'_l e^{\hat{\beta}'_k \mathbf{X}_l} (\hat{\beta}^{(1)} - \hat{\beta}_k)}{\sum_{k=1}^K \sum_{l \in R_i(k)} e^{\hat{\beta}'_k \mathbf{X}_l} + \sum_{k=1}^K \sum_{l \in R_i(k)} \mathbf{X}_l e^{\hat{\beta}'_k \mathbf{X}_l} (\hat{\beta}^{(1)} - \hat{\beta}_k)} \right] \\ & - \sum_{j=1}^d \left[ \frac{I(i \in R_j) \{ e^{\hat{\beta}'_k \mathbf{X}_i} + \mathbf{X}_i e^{\hat{\beta}'_k \mathbf{X}_i} (\hat{\beta}^{(1)} - \hat{\beta}_k) \}}{\sum_{k=1}^K \sum_{l \in R_j(k)} e^{\hat{\beta}'_k \mathbf{X}_l} + \sum_{k=1}^K \sum_{l \in R_j(k)} \mathbf{X}_l e^{\hat{\beta}'_k \mathbf{X}_l} (\hat{\beta}^{(1)} - \hat{\beta}_k)} \times \right. \\ & \left. \left( \mathbf{X}_i - \frac{\sum_{k=1}^K \sum_{l \in R_j(k)} \mathbf{X}_l e^{\hat{\beta}'_k \mathbf{X}_l} + \sum_{k=1}^K \sum_{l \in R_j(k)} \mathbf{X}_l e^{\hat{\beta}'_k \mathbf{X}_l} (\hat{\beta}^{(1)} - \hat{\beta}_k)}{\sum_{k=1}^K \sum_{l \in R_j(k)} e^{\hat{\beta}'_k \mathbf{X}_l} + \sum_{k=1}^K \sum_{l \in R_j(k)} \mathbf{X}_l e^{\hat{\beta}'_k \mathbf{X}_l} (\hat{\beta}^{(1)} - \hat{\beta}_k)} \right) \right], \end{aligned}$$

which can be viewed as a Taylor approximation of the iid terms. Each site can calculate its  $\sum_{i \in \Omega_k} \omega_i(\hat{\beta}_k)^{\otimes 2}$  and send it to the analysis center. To calculate the last row in the matrix  $\mathbf{B}^{(1)}$ , the center needs to send back to each site the summed terms  $\sum_{k=1}^K \sum_{l \in R_j(k)} e^{\hat{\beta}'_k \mathbf{X}_l}$ ,  $\sum_{k=1}^K \sum_{l \in R_j(k)} \mathbf{X}'_l e^{\hat{\beta}'_k \mathbf{X}_l} (\hat{\beta}^{(1)} - \hat{\beta}_k)$ , and  $\sum_{k=1}^K \sum_{l \in R_j(k)} \mathbf{X}_l \mathbf{X}'_l e^{\hat{\beta}'_k \mathbf{X}_l} (\hat{\beta}^{(1)} - \hat{\beta}_k)$  for  $j = 1, \dots, d$ , together with the  $\hat{\beta}^{(1)}$ . Thus, two additional file transfers are required if one wants to evaluate the robust variance estimator.

S1.3 *Summary-level Information*

Table S1 shows the summary level information required for the unstratified and stratified distributed methods.

Table S1: File transfers for unstratified and stratified distributed analysis.

|                   | Unstratified                                                                  |       | Stratified                                                                    |       |
|-------------------|-------------------------------------------------------------------------------|-------|-------------------------------------------------------------------------------|-------|
| No. of transfers  | 3                                                                             |       | 1                                                                             |       |
| Transfer 1        | (site to center): Information on observed times †                             |       | (not required)                                                                |       |
| Transfer 2        | (center to site): Information on observed times †                             |       | (not required)                                                                |       |
| <b>Transfer 3</b> | <b>Summary-level statistics</b>                                               | count | <b>Summary-level statistics from each site</b>                                | count |
| Scalars           | $\sum_{l \in R_j(k)} e^{\beta_l^* \mathbf{X}_l}$                              | $d$   | $\sum_{l \in R_j(k)} e^{\beta_l^* \mathbf{X}_l}$                              | $d_k$ |
| Vectors           | $\sum_{j \in D_k} \mathbf{X}_{i(j)}$                                          | 1     | $\sum_{j \in D_k} \mathbf{X}_{i(j)}$                                          | 1     |
|                   | $\hat{\beta}_k$                                                               | 1     | $\hat{\beta}_k$                                                               | 1     |
|                   | $\sum_{l \in R_j(k)} \mathbf{X}_l e^{\beta_l^* \mathbf{X}_l}$                 | $d$   | $\sum_{l \in R_j(k)} \mathbf{X}_l e^{\beta_l^* \mathbf{X}_l}$                 | $d_k$ |
| Matrices          | $\sum_{l \in R_j(k)} \mathbf{X}_l \mathbf{X}_l' e^{\beta_l^* \mathbf{X}_l}$ ‡ | $d$   | $\sum_{l \in R_j(k)} \mathbf{X}_l \mathbf{X}_l' e^{\beta_l^* \mathbf{X}_l}$ ‡ | $d_k$ |
|                   | $\sum_{l \in R_j(k)} \mathbf{X}_l \mathbf{X}_l' e^{\beta_l^* \mathbf{X}_l}$   | $d$   | $\sum_{l \in R_j(k)} \mathbf{X}_l \mathbf{X}_l' e^{\beta_l^* \mathbf{X}_l}$   | $d_k$ |

†: There are three methods for transfer 1 and transfer 2:

- (1) Sites send observed original or monotonically transformed failure times to center. Center sends merged times to site.
- (2) Sites send observed (failure or censoring) times to center. Center sends the overall ranks of the respective site's observed times and the ranks of all failure times to site.
- (3) Sites send observed (failure or censoring) times to center. Center send the risk sets to each site.

‡: required for variance estimation

## S2. ADDITIONAL DETAILS AND RESULTS FOR SECTION 3

**Definition of confidence interval overlap statistic (cios)**

Cios is a measure of the degree of overlap between confidence intervals obtained based on the same regression fit using the distributed data and the pooled data. Let  $\beta_1$  be the coefficient (e.g., the log hazard ratio for treatment) in the Cox PH regression model, following Karr *and others* (2006), the cios for the estimated  $\hat{\beta}_1$  is defined as follows. Let  $(L_{\text{dist}}, U_{\text{dist}})$  be the 95% confidence interval for the coefficient  $\hat{\beta}_1$  obtained from the distributed (stratified or unstratified) regression analysis, and let  $(L_{\text{pool}}, U_{\text{pool}})$  be the corresponding interval for the estimate  $\tilde{\beta}_1$  obtained from the corresponding (stratified or unstratified) regression analysis using the pooled data. Let  $\hat{f}_{\text{dist}}$  and  $\hat{f}_{\text{pool}}$  be the estimated posterior distribution of  $\beta_1$  computed under the distributed regression and the pooled regression, respectively. In our simulation setting, it was a normal distribution with mean  $\hat{\beta}_1$  or  $\tilde{\beta}_1$  and variance the respective estimated variance. The cios is defined as  $\frac{1}{2} \left[ \int_{L_{\text{dist}}}^{U_{\text{dist}}} \hat{f}_{\text{pool}}(t) dt + \int_{L_{\text{pool}}}^{U_{\text{pool}}} \hat{f}_{\text{dist}}(t) dt \right]$ . By design,  $0 \leq \text{cios} \leq 0.95$  with effectively no overlap corresponding to  $\text{cios} = 0$  and perfect overlap corresponding to  $\text{cios} = 0.95$ .

Table S2: Simulation parameter specification.

|                      | $K$                | $p$ | $n_k$                                                             | X distributions (for $X_1, \dots, X_p$ )                                                                                                          |
|----------------------|--------------------|-----|-------------------------------------------------------------------|---------------------------------------------------------------------------------------------------------------------------------------------------|
| Table 1, S3, S5      | 3                  | 3   | as shown in tables                                                | B(0.5); N(0,1); B(0.5)                                                                                                                            |
| Table 2              | 3                  | 3   | as shown in tables                                                | site1: B(0.5); N(0,1); $X_2 + N(0, 0.04)$<br>site2: B(0.5); $5X_1 + N(0, 0.5)$ ; N(2, 0.5)<br>site3: Ber(0.9); $1/3X_1 + N(0, 0.04)$ ; N(-1, 1.5) |
| Table 3 and Table S4 | 3                  | 5   | (167, 167, 166); (83, 166, 251)                                   | B(0.5); N(0,1); Ber(0.3); N(0, 0.25); Ber(0.7)                                                                                                    |
|                      | 3                  | 7   | (167, 167, 166); (83, 166, 251)                                   | B(0.5); N(0,1); Ber(0.3); N(0, 0.25); Ber(0.7); N(0, 0.5); Ber(0.2)                                                                               |
|                      | 5                  | 5   | $n_k = 100$ for all $k$ ; (50, 50, 50, 175, 175)                  | B(0.5); N(0,1); Ber(0.3); N(0, 0.25); Ber(0.7)                                                                                                    |
|                      | 10                 | 5   | $n_k = 50$ for all $k$ ; (25, 25, 25, 25, 25, 75, 75, 75, 75, 75) | B(0.5); N(0,1); Ber(0.3); N(0, 0.25); Ber(0.7)                                                                                                    |
|                      | 5                  | 7   | $n_k = 100$ for all $k$ ; (50, 50, 50, 175, 175)                  | B(0.5); N(0,1); Ber(0.3); N(0, 0.25); Ber(0.7); N(0, 0.5); Ber(0.2)                                                                               |
|                      | 10                 | 7   | $n_k = 50$ for all $k$ ; (25, 25, 25, 25, 25, 75, 75, 75, 75, 75) | B(0.5); N(0,1); Ber(0.3); N(0, 0.25); Ber(0.7); N(0, 0.5); Ber(0.2)                                                                               |
|                      | all other settings |     |                                                                   | $X_{odd}$ : B(0.5); $X_{even}$ : N(0,1)                                                                                                           |

Table S3: Comparing distributed Cox regression (Dist), pooled Cox regression (Pooled), multi-variate meta-analysis (MulV), and univariate meta-analysis (UniV) with simulated data of sample sizes  $n = 500, 1000, 3000$  under two data generating models: unstratified and stratified model. Sizes for the data-contributing sites  $n_k$  are different and provided in the table below. Covariates distributions for all the data-contributing sites are the same. True log HR value is  $\beta_{01} = 1/3$ . Number of replications = 10000.

| Method                                  | Data Generating Model: unstratified |        |            |        |               |        | Data Generating Model: stratified |         |            |         |               |         |        |
|-----------------------------------------|-------------------------------------|--------|------------|--------|---------------|--------|-----------------------------------|---------|------------|---------|---------------|---------|--------|
|                                         | Unstratified                        |        | Stratified |        | Meta-Analysis |        | Unstratified                      |         | Stratified |         | Meta-Analysis |         |        |
|                                         | Pooled                              | Dist   | Pooled     | Dist   | MulV          | UniV   | Pooled                            | Dist    | Pooled     | Dist    | MulV          | UniV    |        |
| $K = 3; n_k = (83, 167, 250); p = 3$    |                                     |        |            |        |               |        |                                   |         |            |         |               |         |        |
| bias                                    | 0.0020                              | 0.0135 | 0.0019     | 0.0138 | 0.0011        | 0.0032 | bias                              | -0.0223 | -0.0113    | 0.0020  | 0.0140        | 0.0013  | 0.0034 |
| cr <sup>1</sup>                         | 0.9490                              | 0.9532 | 0.9524     | 0.9530 | 0.9529        | 0.9505 | cr <sup>1</sup>                   | 0.9414  | 0.9648     | 0.9491  | 0.9514        | 0.9499  | 0.9501 |
| mae <sup>2</sup>                        | 0.0789                              | 0.0809 | 0.0800     | 0.0822 | 0.0798        | 0.0808 | mae <sup>2</sup>                  | 0.0827  | 0.0821     | 0.0809  | 0.0830        | 0.0807  | 0.0818 |
| cios <sup>3</sup>                       | 0.9500                              | 0.9450 | 0.9471     | 0.9417 | 0.9471        | 0.9453 | cios <sup>3</sup>                 | 0.9215  | 0.9261     | 0.9500  | 0.9452        | 0.9500  | 0.9483 |
| sse <sup>4</sup>                        | 0.0991                              | 0.1007 | 0.1004     | 0.1023 | 0.1002        | 0.1014 | sse                               | 0.1011  | 0.1022     | 0.1014  | 0.1032        | 0.1011  | 0.1024 |
| ese <sup>5</sup>                        | 0.0992                              | 0.1015 | 0.1005     | 0.1038 | 0.1004        | 0.1011 | ese                               | 0.1000  | 0.1025     | 0.1015  | 0.1045        | 0.1014  | 0.1021 |
| rse <sup>6</sup>                        | 0.0984                              | 0.1029 |            |        |               |        | rse                               | 0.0999  | 0.1113     |         |               |         |        |
| $K = 3; n_k = (167, 333, 500); p = 3$   |                                     |        |            |        |               |        |                                   |         |            |         |               |         |        |
| bias                                    | 0.0010                              | 0.0065 | 0.0009     | 0.0066 | 0.0006        | 0.0017 | bias                              | -0.0241 | -0.0180    | 0.0009  | 0.0067        | 0.0006  | 0.0016 |
| cr                                      | 0.9548                              | 0.9551 | 0.9537     | 0.9530 | 0.9539        | 0.9531 | cr                                | 0.9359  | 0.9613     | 0.9543  | 0.9541        | 0.9544  | 0.9547 |
| mae                                     | 0.0548                              | 0.0553 | 0.0552     | 0.0558 | 0.0551        | 0.0554 | mae                               | 0.0592  | 0.0580     | 0.0557  | 0.0563        | 0.0556  | 0.0560 |
| cios                                    | 0.9500                              | 0.9478 | 0.9484     | 0.9463 | 0.9484        | 0.9476 | cios                              | 0.9153  | 0.9227     | 0.9500  | 0.9479        | 0.9500  | 0.9492 |
| sse                                     | 0.0689                              | 0.0693 | 0.0694     | 0.0699 | 0.0693        | 0.0697 | sse                               | 0.0703  | 0.0706     | 0.0701  | 0.0706        | 0.0700  | 0.0704 |
| ese                                     | 0.0698                              | 0.0705 | 0.0703     | 0.0711 | 0.0702        | 0.0705 | ese                               | 0.0704  | 0.0712     | 0.0710  | 0.0717        | 0.0709  | 0.0712 |
| rse                                     | 0.0695                              | 0.0709 |            |        |               |        | rse                               | 0.0706  | 0.0772     |         |               |         |        |
| $K = 3; n_k = (500, 1000, 1500); p = 3$ |                                     |        |            |        |               |        |                                   |         |            |         |               |         |        |
| bias                                    | 0.0001                              | 0.0018 | 0.0000     | 0.0018 | -0.0001       | 0.0002 | bias                              | -0.0250 | -0.0221    | -0.0001 | 0.0017        | -0.0002 | 0.0001 |
| cr                                      | 0.9492                              | 0.9487 | 0.9488     | 0.9476 | 0.9488        | 0.9486 | cr                                | 0.9051  | 0.9391     | 0.9491  | 0.9493        | 0.9489  | 0.9492 |
| mae                                     | 0.0321                              | 0.0322 | 0.0322     | 0.0323 | 0.0322        | 0.0323 | mae                               | 0.0385  | 0.0372     | 0.0324  | 0.0325        | 0.0324  | 0.0325 |
| cios                                    | 0.9500                              | 0.9494 | 0.9494     | 0.9488 | 0.9494        | 0.9491 | cios                              | 0.8854  | 0.8995     | 0.9500  | 0.9494        | 0.9500  | 0.9497 |
| sse                                     | 0.0404                              | 0.0404 | 0.0405     | 0.0406 | 0.0405        | 0.0406 | sse                               | 0.0408  | 0.0408     | 0.0407  | 0.0408        | 0.0407  | 0.0408 |
| ese                                     | 0.0401                              | 0.0403 | 0.0402     | 0.0404 | 0.0402        | 0.0403 | ese                               | 0.0405  | 0.0407     | 0.0406  | 0.0408        | 0.0406  | 0.0407 |
| rse                                     | 0.0401                              | 0.0403 |            |        |               |        | rse                               | 0.0407  | 0.0441     |         |               |         |        |

cr<sup>1</sup>: coverage rate; mae<sup>2</sup>: mean absolute error; cios<sup>3</sup>: confidence interval overlap statistics  
sse<sup>4</sup>: sample standard error; ese<sup>5</sup>: estimated standard error; rse<sup>6</sup>: robust standard error estimate







Table S5. Comparing distributed Cox regression with different orders of Taylor expansion with data generated from the unstratified Cox PH models. Sample size  $n = 3000$ . Taylor 1-4 represents the first-order to fourth-order Taylor expansion. The sizes of the data-contributing sites are approximately the same. Covariates distributions of the data-contributing sites are the same. The true log HR for treatment  $\beta_{01} = 1/3$ . Number of replications = 10000.

| Method            | Unstratified | Unstratified |          |          |          | Stratified | Stratified |          |          |          |
|-------------------|--------------|--------------|----------|----------|----------|------------|------------|----------|----------|----------|
|                   | Pooled       | Taylor 1     | Taylor 2 | Taylor 3 | Taylor 4 | Pooled     | Taylor 1   | Taylor 2 | Taylor 3 | Taylor 4 |
| bias              | 0.0035       | 0.0146       | 0.0029   | 0.0037   | 0.0034   | 0.0033     | 0.0145     | 0.0025   | 0.0035   | 0.0033   |
| cr <sup>1</sup>   | 0.9542       | 0.9556       | 0.9457   | 0.9521   | 0.9516   | 0.9523     | 0.9530     | 0.9525   | 0.9522   | 0.9523   |
| mae <sup>2</sup>  | 0.0785       | 0.0805       | 0.0785   | 0.0785   | 0.0785   | 0.0796     | 0.0816     | 0.0796   | 0.0796   | 0.0796   |
| cios <sup>3</sup> | 0.9500       | 0.9455       | 0.9493   | 0.9498   | 0.9498   | 0.9470     | 0.9429     | 0.9469   | 0.9470   | 0.9470   |
| sse <sup>4</sup>  | 0.0985       | 0.0999       | 0.0984   | 0.0985   | 0.0985   | 0.0999     | 0.1015     | 0.0999   | 0.0999   | 0.0999   |
| ese <sup>5</sup>  | 0.0992       | 0.1012       | 0.0994   | 0.0992   | 0.0992   | 0.1005     | 0.1026     | 0.1006   | 0.1005   | 0.1005   |
| rse <sup>6</sup>  | 0.0984       | 0.1025       | 0.0963   | 0.0985   | 0.0983   |            |            |          |          |          |

<sup>1</sup>: coverage rate; <sup>2</sup>: mean absolute error; <sup>3</sup>: confidence interval overlap statistics

sse<sup>4</sup>: sample standard error; ese<sup>5</sup>: estimated standard error; rse<sup>6</sup>: robust standard error estimate

### S3. ADDITIONAL DETAILS AND RESULTS FOR SECTION 4

Table S6. Comparing distributed Cox regression, pooled Cox regression, and meta-analyses with real data under partition 1. Results are presented as logHR with estimated standard error in brackets.

|                                       | Unstratified    | Unstratified    | Stratified      | Stratified      | Univariate      | Multivariate    |
|---------------------------------------|-----------------|-----------------|-----------------|-----------------|-----------------|-----------------|
|                                       | Pooled          | Distributed     | Pooled          | Distributed     | Meta-Analysis   | Meta-Analysis   |
| treatment                             | -0.359 (0.1007) | -0.366 (0.1043) | -0.359 (0.1007) | -0.366 (0.1045) | -0.361 (0.1012) | -0.362 (0.1011) |
| age                                   | -0.165 (0.0541) | -0.170 (0.0569) | -0.165 (0.0541) | -0.170 (0.0570) | -0.163 (0.0541) | -0.167 (0.0540) |
| comorbidity score                     | 0.137 (0.0304)  | 0.144 (0.0334)  | 0.137 (0.0304)  | 0.144 (0.0333)  | 0.131 (0.0310)  | 0.142 (0.0307)  |
| diagnosis of cancer                   | -0.226 (0.1931) | -0.164 (0.2151) | -0.224 (0.1930) | -0.164 (0.2143) | -0.190 (0.1943) | -0.182 (0.1938) |
| depression                            | -0.254 (0.1110) | -0.243 (0.1202) | -0.255 (0.1110) | -0.244 (0.1203) | -0.242 (0.1117) | -0.248 (0.1115) |
| diabetes                              | -0.049 (0.1103) | -0.042 (0.1152) | -0.048 (0.1103) | -0.041 (0.1151) | -0.051 (0.1108) | -0.050 (0.1106) |
| eating disorder                       | 0.097 (0.1269)  | 0.094 (0.1312)  | 0.098 (0.1269)  | 0.095 (0.1312)  | 0.105 (0.1273)  | 0.101 (0.1272)  |
| gastroesophageal reflux disease       | 0.322 (0.1049)  | 0.324 (0.1056)  | 0.323 (0.1049)  | 0.325 (0.1057)  | 0.313 (0.1054)  | 0.323 (0.1052)  |
| hypertension                          | 0.180 (0.1183)  | 0.185 (0.1166)  | 0.180 (0.1183)  | 0.184 (0.1166)  | 0.176 (0.1185)  | 0.184 (0.1182)  |
| non-alcoholic fatty liver disease     | -0.264 (0.1280) | -0.276 (0.1336) | -0.264 (0.1280) | -0.276 (0.1336) | -0.236 (0.1285) | -0.268 (0.1280) |
| number of emergency department visits | -0.500 (0.2305) | -0.510 (0.2469) | -0.496 (0.2306) | -0.507 (0.2463) | -0.511 (0.2347) | -0.524 (0.2338) |
| number of unique generic medications. | 0.714 (0.2189)  | 0.736 (0.2352)  | 0.710 (0.2189)  | 0.732 (0.2349)  | 0.733 (0.2241)  | 0.748 (0.2232)  |

Table S7. Comparing distributed Cox regression, pooled Cox regression, and meta-analyses with real data under partition 2. Results are presented as logHR with estimated standard error in brackets.

|                                       | Unstratified    | Unstratified    | Stratified      | Stratified      | Univariate      | Multivariate    |
|---------------------------------------|-----------------|-----------------|-----------------|-----------------|-----------------|-----------------|
|                                       | Pooled          | Distributed     | Pooled          | Distributed     | Meta-Analysis   | Meta-Analysis   |
| treatment                             | -0.359 (0.1007) | -0.361 (0.1063) | -0.338 (0.1240) | -0.353 (0.1272) | -0.318 (0.1302) | -0.347 (0.1210) |
| age                                   | -0.165 (0.0541) | -0.167 (0.0587) | -0.157 (0.0616) | -0.163 (0.0649) | -0.139 (0.0656) | -0.154 (0.0612) |
| comorbidity score                     | 0.137 (0.0304)  | 0.139 (0.0342)  | 0.132 (0.0355)  | 0.139 (0.0379)  | 0.124 (0.0380)  | 0.133 (0.0348)  |
| diagnosis of cancer                   | -0.226 (0.1931) | -0.209 (0.2071) | -0.216 (0.1974) | -0.207 (0.2111) | -0.129 (0.2027) | -0.184 (0.1978) |
| depression                            | -0.254 (0.1110) | -0.245 (0.1171) | -0.241 (0.1206) | -0.239 (0.1257) | -0.168 (0.1270) | -0.231 (0.1209) |
| diabetes                              | -0.049 (0.1103) | -0.059 (0.1177) | -0.049 (0.1103) | -0.060 (0.1179) | -0.036 (0.1109) | -0.046 (0.1100) |
| eating disorder                       | 0.097 (0.1269)  | 0.099 (0.1351)  | 0.090 (0.1288)  | 0.094 (0.1366)  | 0.075 (0.1296)  | 0.104 (0.1281)  |
| gastroesophageal reflux disease       | 0.322 (0.1049)  | 0.313 (0.1068)  | 0.304 (0.1246)  | 0.303 (0.1236)  | 0.239 (0.1336)  | 0.298 (0.1245)  |
| hypertension                          | 0.180 (0.1183)  | 0.203 (0.1281)  | 0.174 (0.1214)  | 0.203 (0.1308)  | 0.082 (0.1304)  | 0.171 (0.1219)  |
| non-alcoholic fatty liver disease     | -0.264 (0.1280) | -0.267 (0.1475) | -0.254 (0.1347) | -0.266 (0.1532) | -0.155 (0.1495) | -0.227 (0.1349) |
| number of emergency department visits | -0.500 (0.2305) | -0.497 (0.2395) | -0.518 (0.2364) | -0.508 (0.2444) | -0.580 (0.2413) | -0.522 (0.2375) |
| number of unique generic medications. | 0.714 (0.2189)  | 0.705 (0.2262)  | 0.723 (0.2198)  | 0.713 (0.2271)  | 0.731 (0.2252)  | 0.725 (0.2215)  |

Table S8: Covariate distribution of the sites under two partitions. Results are presented as mean with standard deviation in brackets.

|                                       | partition 1  |              |               | partition 2   |               |               |
|---------------------------------------|--------------|--------------|---------------|---------------|---------------|---------------|
|                                       | Site 1       | Site 2       | Site 3        | Site 1        | Site 2        | Site 3        |
| treatment                             | 0.67 (0.470) | 0.68 (0.468) | 0.67 (0.470)  | 0.85 (0.359)  | 0.59 (0.492)  | 0.35 (0.478)  |
| age                                   | 0.00 (0.990) | 0.01 (1.006) | -0.01 (1.002) | 0.14 (0.955)  | -0.14 (1.007) | -0.13 (1.053) |
| comorbidity score                     | 0.65 (1.480) | 0.66 (1.466) | 0.64 (1.484)  | 0.25 (1.056)  | 0.61 (1.320)  | 1.76 (2.016)  |
| diagnosis of cancer                   | 0.08 (0.273) | 0.08 (0.272) | 0.08 (0.268)  | 0.10 (0.297)  | 0.06 (0.242)  | 0.06 (0.238)  |
| depression                            | 0.29 (0.456) | 0.32 (0.467) | 0.32 (0.466)  | 0.36 (0.481)  | 0.26 (0.441)  | 0.26 (0.441)  |
| diabetes                              | 0.35 (0.478) | 0.36 (0.480) | 0.36 (0.481)  | 0.32 (0.467)  | 0.35 (0.478)  | 0.48 (0.500)  |
| eating disorder                       | 0.17 (0.375) | 0.16 (0.371) | 0.18 (0.382)  | 0.13 (0.341)  | 0.20 (0.401)  | 0.22 (0.412)  |
| gastroesophageal reflux disease       | 0.59 (0.492) | 0.57 (0.494) | 0.58 (0.494)  | 0.38 (0.486)  | 0.74 (0.441)  | 0.84 (0.371)  |
| hypertension                          | 0.65 (0.476) | 0.66 (0.475) | 0.66 (0.474)  | 0.61 (0.487)  | 0.67 (0.471)  | 0.75 (0.432)  |
| non-alcoholic fatty liver disease     | 0.21 (0.409) | 0.20 (0.402) | 0.19 (0.395)  | 0.22 (0.415)  | 0.18 (0.388)  | 0.18 (0.385)  |
| number of emergency department visits | 0.01 (1.003) | 0.00 (0.988) | -0.01 (1.009) | -0.40 (0.762) | 0.10 (0.881)  | 0.88 (1.127)  |
| number of unique generic medications  | 0.00 (0.999) | 0.00 (0.992) | -0.01 (1.008) | -0.40 (0.740) | 0.09 (0.875)  | 0.89 (1.164)  |

Fig. S1: Data application: Plots of distribution of treatment, age, co-morbidity score, and number of generic medications and plots of baseline hazard estimates with two data partitions. First column: partition 1. Second column: partition 2.

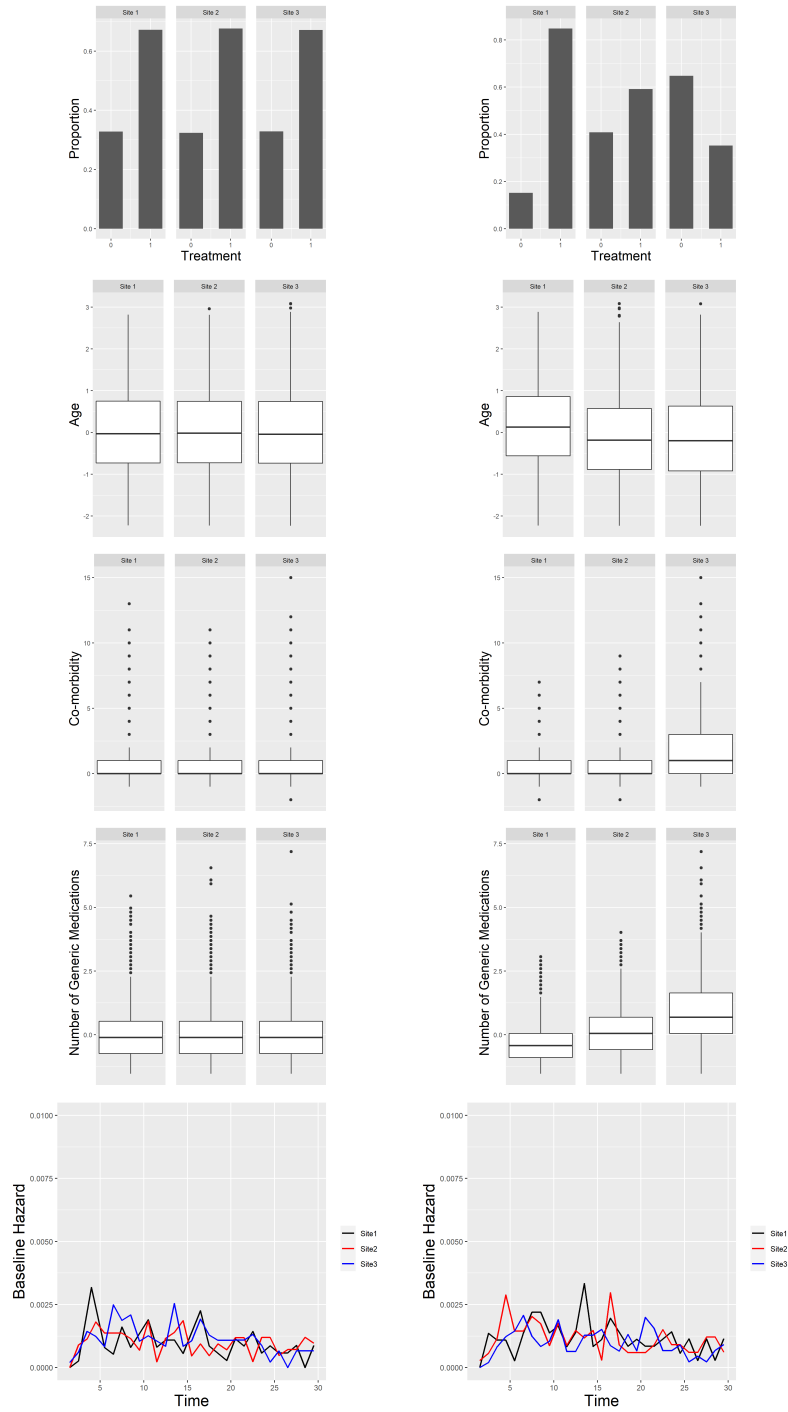

## S4. ILLUSTRATION USING A SIMULATED DATA SET

This section presents the analysis results from a simulated data set. A detailed illustration for how to use the code to reproduce it can be found on [https://github.com/dli-stats/distributed\\_cox\\_paper\\_repro](https://github.com/dli-stats/distributed_cox_paper_repro).

Table S9: Simulated data analysis for illustrative purpose: comparing distributed Cox regression, pooled Cox regression, and meta-analyses with real data. Results are presented as logHR with estimated standard error in brackets.

|                                       | Unstratified<br>Pooled | Unstratified<br>Distributed | Stratified<br>Pooled | Stratified<br>Distributed | Univariate<br>Meta-Analysis | Multivariate<br>Meta-Analysis |
|---------------------------------------|------------------------|-----------------------------|----------------------|---------------------------|-----------------------------|-------------------------------|
| treatment                             | -0.343(0.0802)         | -0.340(0.081)               | -0.344(0.0802)       | -0.341(0.0811)            | -0.344(0.0802)              | -0.341(0.0803)                |
| age                                   | -0.483(0.2206)         | -0.490(0.2305)              | -0.483(0.2206)       | -0.490(0.2304)            | -0.486(0.2208)              | -0.512(0.2214)                |
| comorbidity score                     | 0.092(0.0965)          | 0.089(0.0978)               | 0.091(0.0965)        | 0.088(0.0979)             | 0.089(0.0966)               | 0.087(0.0967)                 |
| diagnosis of cancer                   | -0.217(0.1437)         | -0.197(0.1507)              | -0.217(0.1436)       | -0.197(0.1507)            | -0.201(0.1438)              | -0.200(0.1442)                |
| depression                            | -0.170(0.0865)         | -0.169(0.0886)              | -0.169(0.0865)       | -0.168(0.0886)            | -0.168(0.0866)              | -0.166(0.0867)                |
| diabetes                              | -0.094(0.0829)         | -0.095(0.0834)              | -0.095(0.0829)       | -0.095(0.0834)            | -0.095(0.0829)              | -0.092(0.0831)                |
| eating disorder                       | 0.087(0.0965)          | 0.086(0.0976)               | 0.086(0.0965)        | 0.085(0.0976)             | 0.085(0.0965)               | 0.086(0.0967)                 |
| gastroesophageal reflux disease       | 0.261(0.0807)          | 0.251(0.0843)               | 0.261(0.0807)        | 0.252(0.0843)             | 0.256(0.081)                | 0.252(0.0811)                 |
| hypertension                          | 0.076(0.0857)          | 0.077(0.0863)               | 0.076(0.0857)        | 0.077(0.0864)             | 0.074(0.0858)               | 0.075(0.0859)                 |
| non-alcoholic fatty liver disease     | -0.098(0.1007)         | -0.089(0.1037)              | -0.097(0.1007)       | -0.089(0.1037)            | -0.09(0.1009)               | -0.107(0.1012)                |
| number of emergency department visits | -0.479(0.0409)         | -0.479(0.0421)              | -0.479(0.0409)       | -0.479(0.0421)            | -0.48(0.0409)               | -0.479(0.041)                 |
| number of unique generic medications. | 1.059(0.2226)          | 1.066(0.2297)               | 1.059(0.2226)        | 1.066(0.2295)             | 1.063(0.223)                | 1.092(0.2235)                 |

## REFERENCES

- COX, D. R. AND HINKLEY, D. V. (1974). *Theoretical Statistics*. London: Chapman & Hall.
- KARR, A. F, KOHNEN, C. N, OGANIAN, A, REITER, J. P AND SANIL, A. P. (2006). A framework for evaluating the utility of data altered to protect confidentiality. *The American statistician* **60**(3), 224–232.
- LIN, D. Y. AND WEI, L. J. (1989). The robust inference for the cox proportional hazards model. *Journal of the American Statistical Association* **84**(408), 1074–1078.

[Received August 1, 202x; revised October 1, 202x; accepted for publication November 1, 202x]
